# Supplementary material for: Synthesis, Photo- and Electroluminescence of New Polyfluorene Copolymers Containing Dicyanostilbene and 9,10-Dicyanophenanthrene in the Main Chain
Source: MDPI journal article supplement (doi:10.3390/ma16165592), 2023-08-12
Supplement: s1 [file s1]

# Synthesis, Photo- and Electroluminescence of New Polyfluorene Copolymers Containing Dicyanostilbene and 9,10-Dicyanophenanthrene in the Main Chain

Anton A. Yakimanskiy <sup>1</sup>, Ksenia I. Kaskevich <sup>1</sup>, Elena V. Zhukova <sup>1</sup>, Ivan A. Berezin <sup>1</sup>, Larisa S. Litvinova <sup>1</sup>, Tatiana G. Chulkova <sup>1</sup>, Dmitriy A. Lypenko <sup>2</sup>, Artem V. Dmitriev <sup>2</sup>, Sergey I. Pozin <sup>2</sup>, Natalia V. Nekrasova <sup>2</sup>, Felix N. Tomilin <sup>3,4</sup>, Daria A. Ivanova <sup>4</sup> and Alexander V. Yakimansky <sup>1,\*</sup>

<sup>1</sup> Institute of Macromolecular Compounds RAS, Bolshoi Prospect of Vasilyevsky Island 31, St. Petersburg 199004, Russia; yakimanskii@gmail.com (A.A.Y.); kaskevich-ksenia@yandex.ru (K.I.K.); zukovaev@mail.ru (E.V.Z.); bereziv@mail.ru (I.A.B.); larissa\_litvinova@hotmail.com (L.S.L.); tgc@mail.ru (T.G.C.)

<sup>2</sup> A.N. Frumkin Institute of Physical Chemistry and Electrochemistry RAS, Leninskiy Prospect 31, bld.4, Moscow 119071, Russia; dalypenko@gmail.com (D.A.L.); oleduff@mail.ru (A.V.D.); sergip74@gmail.com (S.I.P.); natalianek@yandex.ru (N.V.N.)

<sup>3</sup> Kirensky Institute of Physics, Federal Research Center KSC SB RAS, Krasnoyarsk 660036, Russia; felixnt@gmail.com

<sup>4</sup> School of Non-Ferrous Metals and Material Science, Siberian Federal University, Krasnoyarsk 660041, Russia; daha-ha@mail.ru

\* Correspondence: yakimansky@yahoo.com; Tel.: +7-812-3237407

**Table S1.** FT-IR and <sup>1</sup>H NMR selected data for synthesized copolyfluorenes.

| CPFs name | IR data, cm <sup>-1</sup>                   | <sup>1</sup> H NMR data, ppm                                                                               |
|-----------|---------------------------------------------|------------------------------------------------------------------------------------------------------------|
| FFCN0.5   | 2921, s (ν <sub>as</sub> CH <sub>2</sub> )  | 7.88-7.86 (m, 2H), 7.74-7.70 (m, 4H), H <sub>ar</sub> fluorene                                             |
|           | 2852, s (ν <sub>s</sub> CH <sub>2</sub> )   | 4.14 (q, J = 7.0 Hz), CH <sub>3</sub> CH <sub>2</sub> O- (terminal)                                        |
|           | 1454, s (ν <sub>s</sub> C-C <sub>ar</sub> ) | 2.5-1.75 (m, 4H) CH <sub>2</sub> octyl                                                                     |
|           | 812, s (δ CH <sub>ar</sub> )                | 1.49 (t, J = 7.0 Hz) CH <sub>3</sub> CH <sub>2</sub> O- (terminal)                                         |
|           |                                             | 1.25-1.17 (m, 22H), CH <sub>2</sub> octyl<br>0.86-0.83 (m, 10H), CH <sub>2</sub> and CH <sub>3</sub> octyl |
| FFCN1     | 2919, s (ν <sub>as</sub> CH <sub>2</sub> )  | 7.88-7.86 (m, 2H), 7.74-7.70 (m, 4H), H <sub>ar</sub> fluorene                                             |
|           | 2853, s (ν <sub>s</sub> CH <sub>2</sub> )   | 4.14 (q, J = 7.0 Hz), CH <sub>3</sub> CH <sub>2</sub> O- (terminal)                                        |
|           | 1452, s (ν <sub>s</sub> C-C <sub>ar</sub> ) | 2.5-1.75 (m, 4H) CH <sub>2</sub> octyl                                                                     |
|           | 811, s (δ CH <sub>ar</sub> )                | 1.49 (t, J = 7.0 Hz) CH <sub>3</sub> CH <sub>2</sub> O- (terminal)                                         |
|           |                                             | 1.25-1.17 (m, 22H), CH <sub>2</sub> octyl<br>0.86-0.83 (m, 10H), CH <sub>2</sub> and CH <sub>3</sub> octyl |
| FFCN2.5   | 2920, s (ν <sub>as</sub> CH <sub>2</sub> )  | 7.88-7.86 (m, 2H), 7.74-7.70 (m, 4H), H <sub>ar</sub> fluorene                                             |
|           | 2853, s (ν <sub>s</sub> CH <sub>2</sub> )   | 4.14 (q, J = 7.0 Hz), CH <sub>3</sub> CH <sub>2</sub> O- (terminal)                                        |
|           | 1454, s (ν <sub>s</sub> C-C <sub>ar</sub> ) | 2.5-1.75 (m, 4H) CH <sub>2</sub> octyl                                                                     |
|           | 812, s (δ CH <sub>ar</sub> )                | 1.49 (t, J = 7.0 Hz) CH <sub>3</sub> CH <sub>2</sub> O- (terminal)                                         |
|           |                                             | 1.25-1.17 (m, 22H), CH <sub>2</sub> octyl<br>0.86-0.83 (m, 10H), CH <sub>2</sub> and CH <sub>3</sub> octyl |
| PFCN0.5   | 2918, s (ν <sub>as</sub> CH <sub>2</sub> )  | 7.88-7.86 (m, 2H), 7.74-7.70 (m, 4H), H <sub>ar</sub> fluorene                                             |
|           | 2853, s (ν <sub>s</sub> CH <sub>2</sub> )   | 4.14 (q, J = 7.0 Hz), CH <sub>3</sub> CH <sub>2</sub> O- (terminal)                                        |
|           | 1453, s (ν <sub>s</sub> C-C <sub>ar</sub> ) | 2.5-1.75 (m, 4H) CH <sub>2</sub> octyl                                                                     |
|           | 810, s (δ CH <sub>ar</sub> )                | 1.49 (t, J = 7.0 Hz) CH <sub>3</sub> CH <sub>2</sub> O- (terminal)                                         |
|           |                                             | 1.25-1.17 (m, 22H), CH <sub>2</sub> octyl<br>0.86-0.83 (m, 10H), CH <sub>2</sub> and CH <sub>3</sub> octyl |
| PFCN1     | 2918, s (ν <sub>as</sub> CH <sub>2</sub> )  | 7.88-7.86 (m, 2H), 7.74-7.70 (m, 4H), H <sub>ar</sub> fluorene                                             |
|           | 2854, s (ν <sub>s</sub> CH <sub>2</sub> )   | 4.14 (q, J = 7.0 Hz), CH <sub>3</sub> CH <sub>2</sub> O- (terminal)                                        |
|           | 1453, s (ν <sub>s</sub> C-C <sub>ar</sub> ) | 2.5-1.75 (m, 4H) CH <sub>2</sub> octyl                                                                     |
|           | 812, s (δ CH <sub>ar</sub> )                | 1.49 (t, J = 7.0 Hz) CH <sub>3</sub> CH <sub>2</sub> O- (terminal)                                         |
|           |                                             | 1.25-1.17 (m, 22H), CH <sub>2</sub> octyl<br>0.86-0.83 (m, 10H), CH <sub>2</sub> and CH <sub>3</sub> octyl |
| PFCN2.5   | 2918, s (ν <sub>as</sub> CH <sub>2</sub> )  | 7.88-7.86 (m, 2H), 7.74-7.70 (m, 4H), H <sub>ar</sub> fluorene                                             |
|           | 2854, s (ν <sub>s</sub> CH <sub>2</sub> )   | 4.14 (q, J = 7.0 Hz), CH <sub>3</sub> CH <sub>2</sub> O- (terminal)                                        |
|           | 1450, s (ν <sub>s</sub> C-C <sub>ar</sub> ) | 2.5-1.75 (m, 4H) CH <sub>2</sub> octyl                                                                     |
|           | 811, s (δ CH <sub>ar</sub> )                | 1.49 (t, J = 7.0 Hz) CH <sub>3</sub> CH <sub>2</sub> O- (terminal)                                         |
|           |                                             | 1.25-1.17 (m, 22H), CH <sub>2</sub> octyl<br>0.86-0.83 (m, 10H), CH <sub>2</sub> and CH <sub>3</sub> octyl |

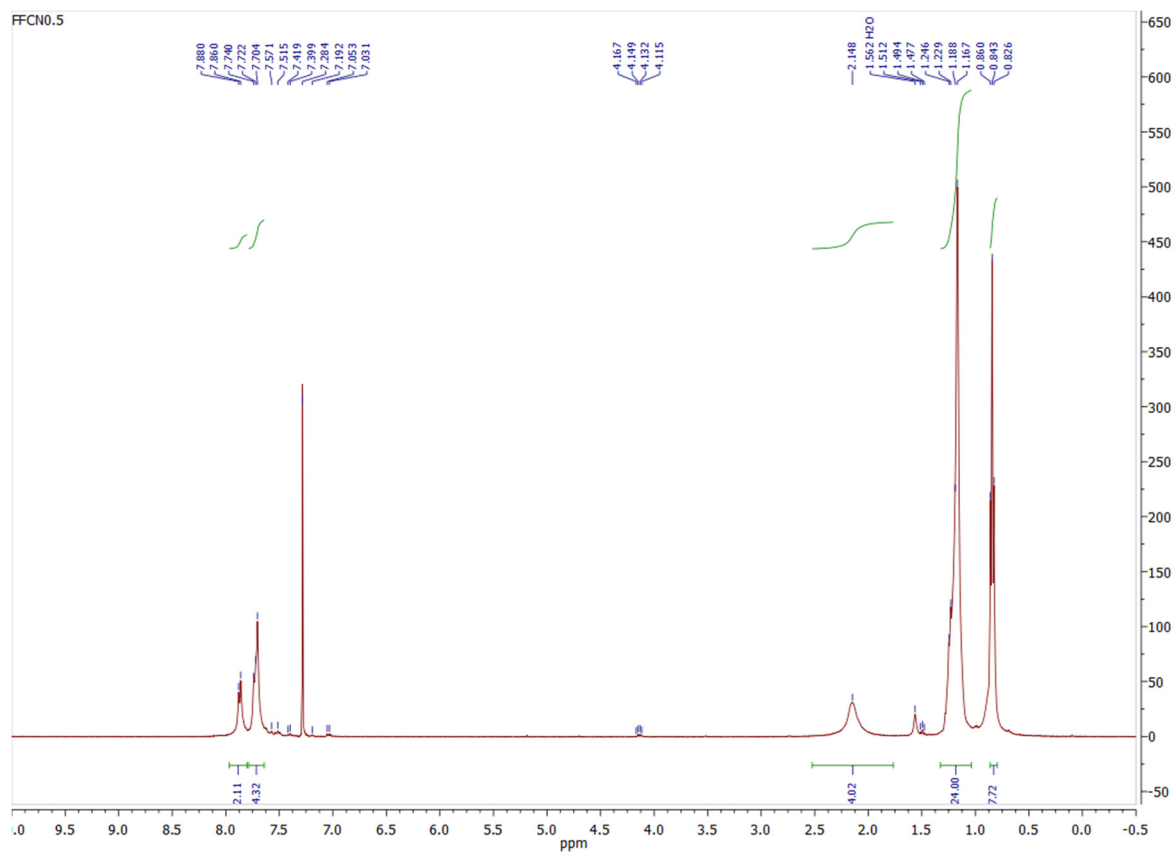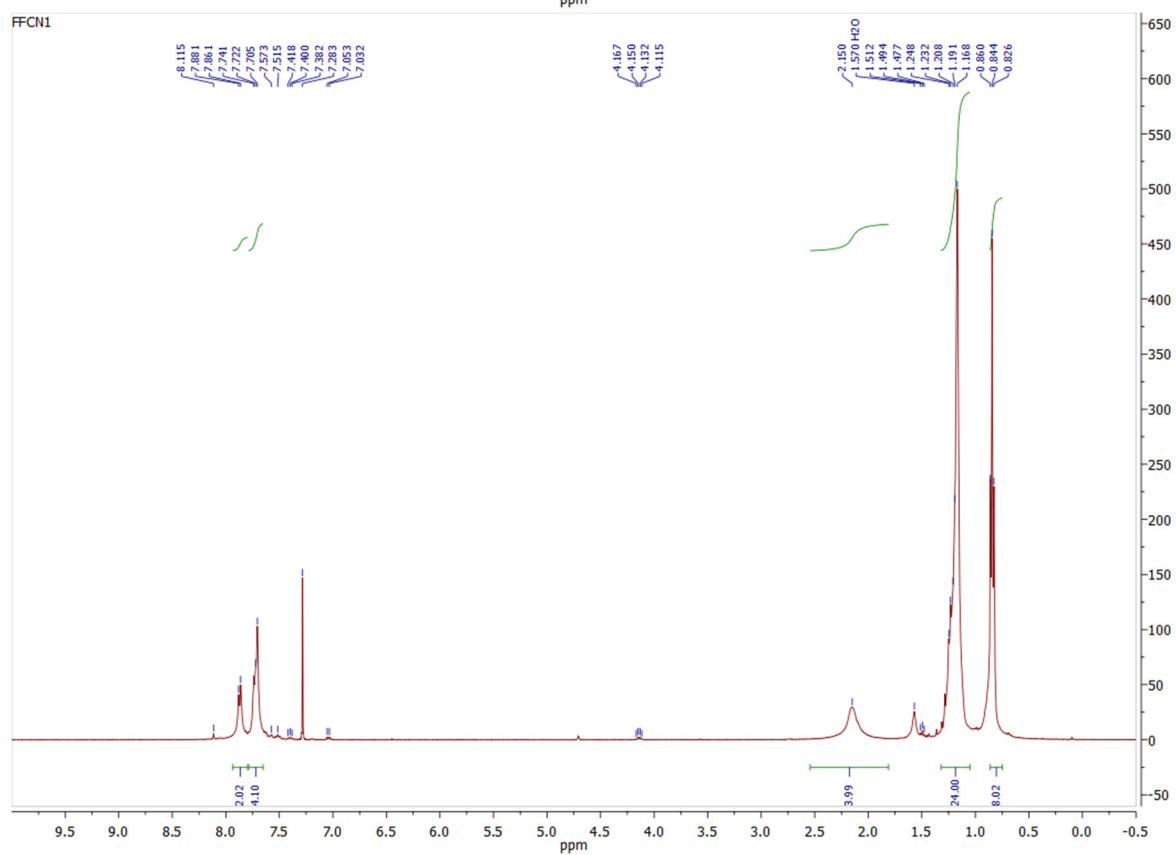

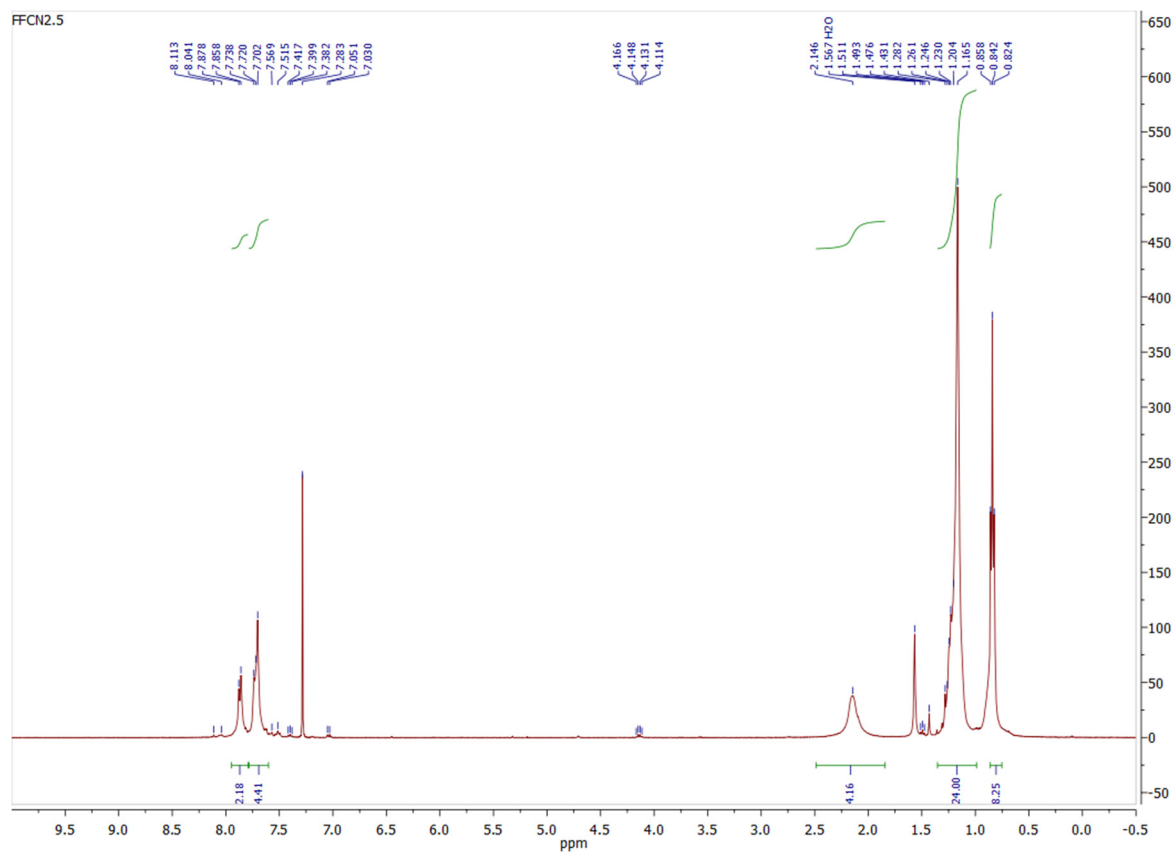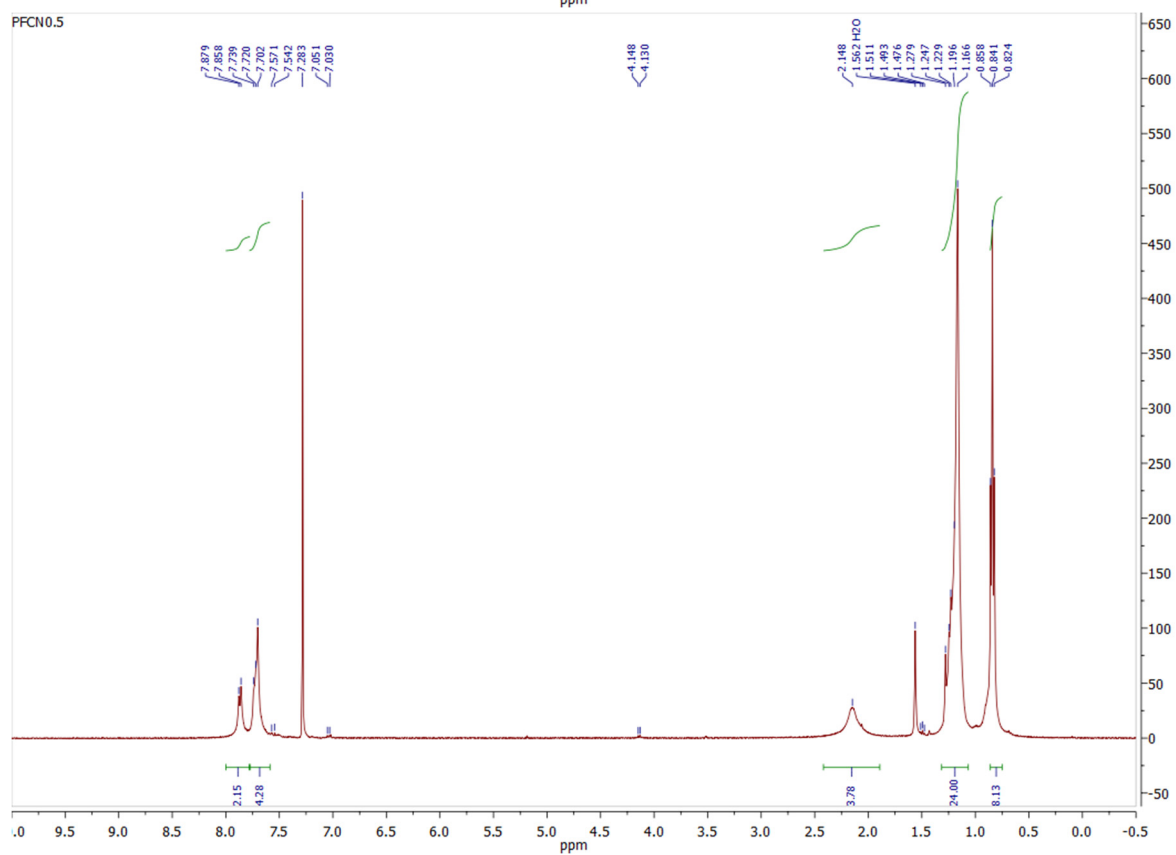

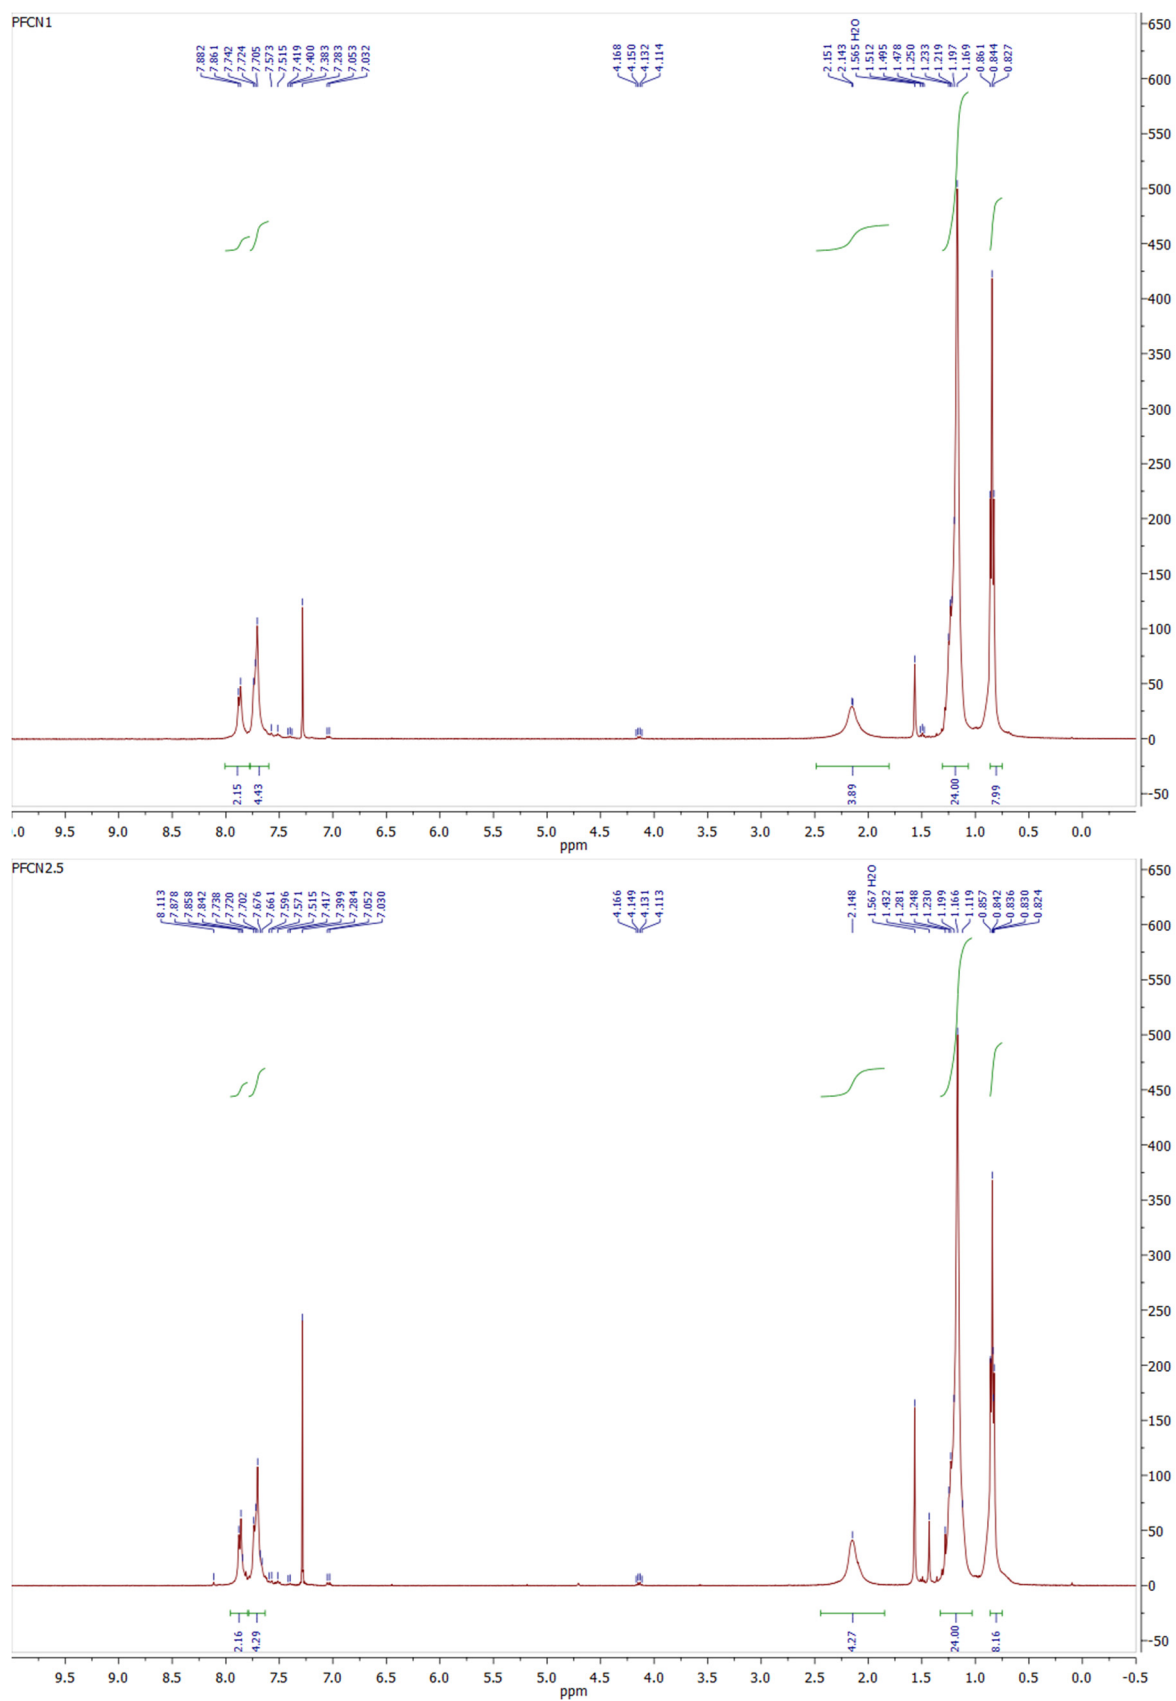

**Figure S1.**  $^1\text{H}$  NMR spectra of CPFs in  $\text{CDCl}_3$ .

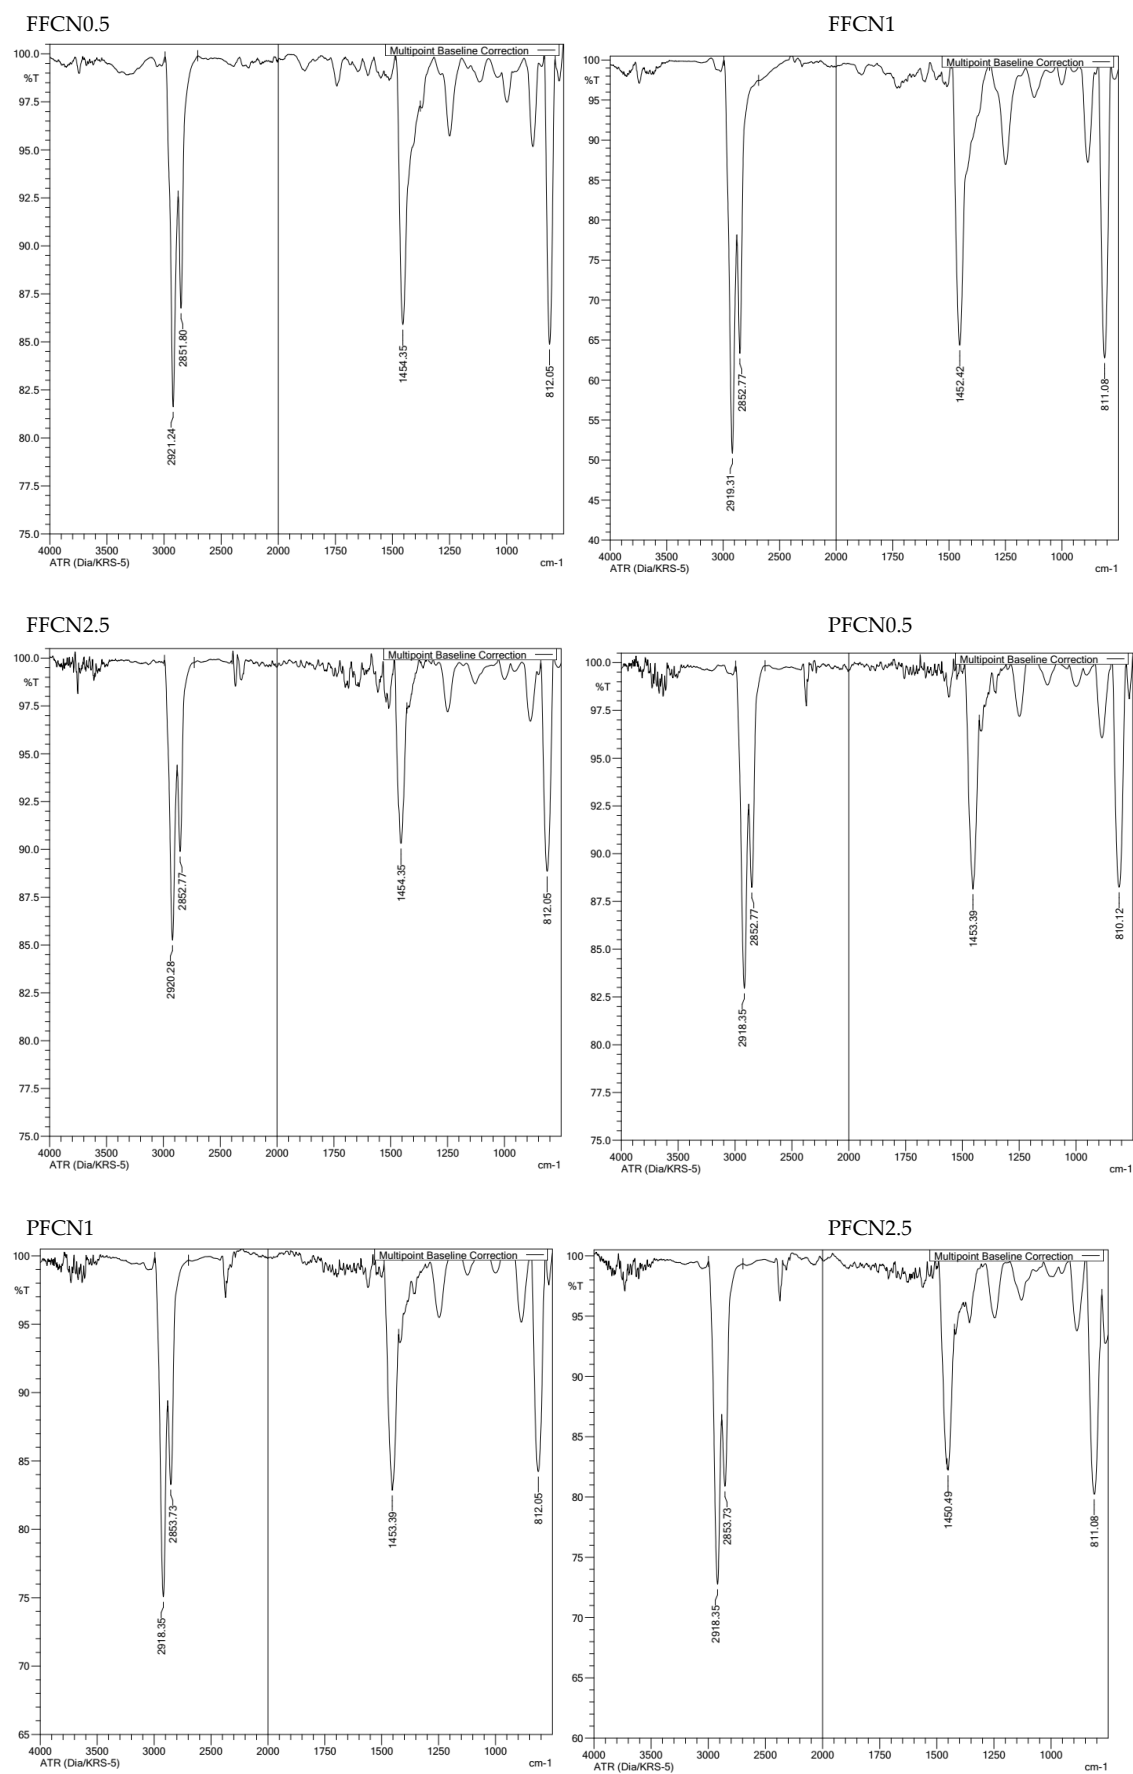

**Figure S2.** FT-IR spectra of synthesized CPFs.

**Table S2.** Spectral data for CPFs films after heating for 4h at 80°C.

| CPFs name | $\lambda_{\text{abs}}, \text{nm}$ | $\lambda_{\text{em}}, \text{nm}$ | Stokes shift, $\text{nm}/\text{cm}^{-1}/\text{eV}$ |
|-----------|-----------------------------------|----------------------------------|----------------------------------------------------|
| FFCN0.5   | 385, 424*                         | 542                              | 118/5135/0.64                                      |
| FFCN1     | 385, 426*                         | 545                              | 119/5126/0.64                                      |
| FFCN2.5   | 382, 422*                         | 551                              | 129/5548/0.69                                      |
| PFCN0.5   | 385, 426*                         | 499                              | 73/3434/0.43                                       |
| PFCN1     | 385, 426*                         | 505                              | 79/3672/0.46                                       |
| PFCN2.5   | 385, 424*                         | 463                              | 39/1987/0.25                                       |

\* Shoulder

FFCN2.5

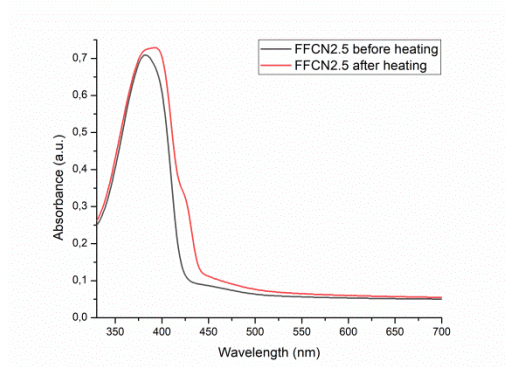

PFCN2.5

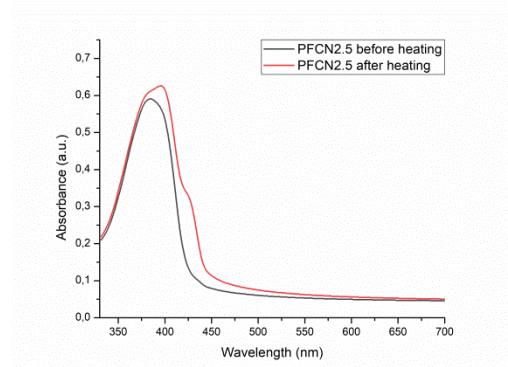

**Figure S3.** UV-vis spectra of FFCN2.5 and PFCN2.5 films before (black line) and after heating at 80°C (red line).

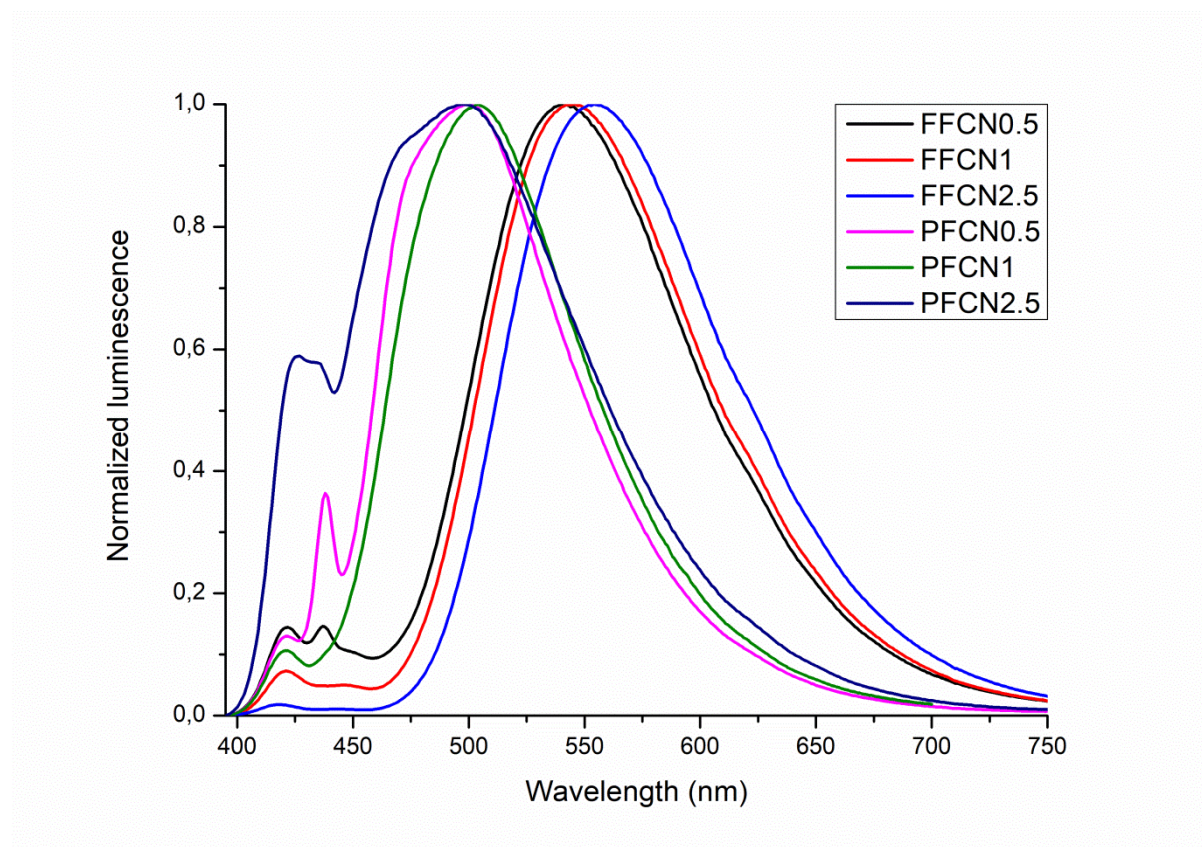

**Figure S4.** Luminescence spectra of CPFs films ( $\lambda_{\text{ex}} = 385 \text{ nm}$ ).

## Cyclic Voltammetry

FFCN0.5

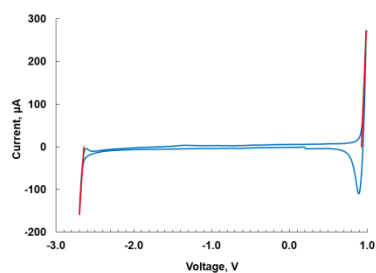

FFCN1

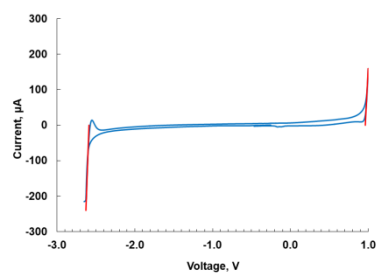

FFCN2.5

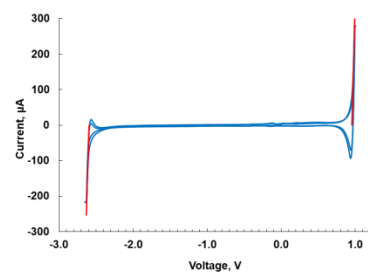

PFCN0.5

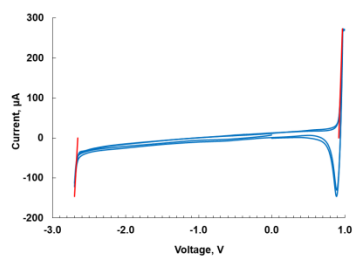

PFCN1

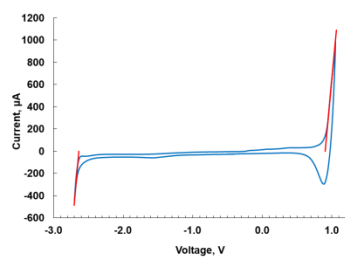

PFCN2.5

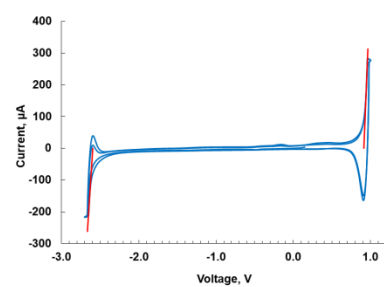

**Figure S5.** CVA curves for CPFs.
